# Supplementary material for: Predictors of Loneliness among Homeless Individuals in Germany during the COVID-19 Pandemic
Source: MDPI journal article supplement (doi:10.3390/ijerph191912718), 2022-10-05
Supplement: s1 [file s1]

**Supplementary Table S1.** Correlation matrix for continuous measures (among total sample).

|                           | 1      | 2     | 3 |
|---------------------------|--------|-------|---|
| 1: Age                    | 1      |       |   |
| 2: Concerning of COVID-19 | 0.2*** | 1     |   |
| 3: Loneliness             | 0.0+   | 0.1** | 1 |

\*\*\* p<0.001, \*\* p<0.01, + p<0.10

**Supplementary Table S2.** Correlation matrix for continuous measures (among men).

|                           | 1     | 2    | 3 |
|---------------------------|-------|------|---|
| 1: Age                    | 1     |      |   |
| 2: Concerning of COVID-19 | 0.2+  | 1    |   |
| 3: Loneliness             | -0.0+ | 0.1+ | 1 |

+ p<0.10

**Supplementary Table S3.** Correlation matrix for continuous measures (among women).

|                           | 1    | 2    | 3 |
|---------------------------|------|------|---|
| 1: Age                    | 1    |      |   |
| 2: Concerning of COVID-19 | 0.2* | 1    |   |
| 3: Loneliness             | 0.2* | 0.2* | 1 |

\* p<0.05
